# Supplementary material for: GL7 ligand expression defines a novel subset of CD4+ TRM cells in lungs recovered from pneumococcus
Source: PubMed Central journal article supplement — Mucosal Immunol. Author manuscript; Available in PMC 2023 Oct 23. (PMC10591822; doi:10.1016/j.mucimm.2023.07.004), 2023-09-14
Supplement: NIHMS1937089-supplement-1.pdf [file NIHMS1937089-supplement-1.pdf]

## **SUPPLEMENTAL MATERIAL**

### **GL7 ligand expression defines a novel subset of CD4<sup>+</sup> T<sub>RM</sub> cells in lungs recovered from pneumococcus.**

Carolina Lyon De Ana, Anukul T. Shenoy, Kimberly A. Barker, Emad I. Arafa, Neelou S. Etesami, Filiz T. Korkmaz, Alicia M. Soucy, Michael P. Breen, Ian M.C. Martin, Brian R. Tilton, Priyadharshini Devarajan, Nicholas A. Crossland, Riley M.F. Pihl, Wesley N. Goltry, Anna C. Belkina, Matthew R. Jones, Lee J. Quinton, and Joseph P. Mizgerd.

# SUPPLEMENTAL FIGURES

## Supplemental Figure 1

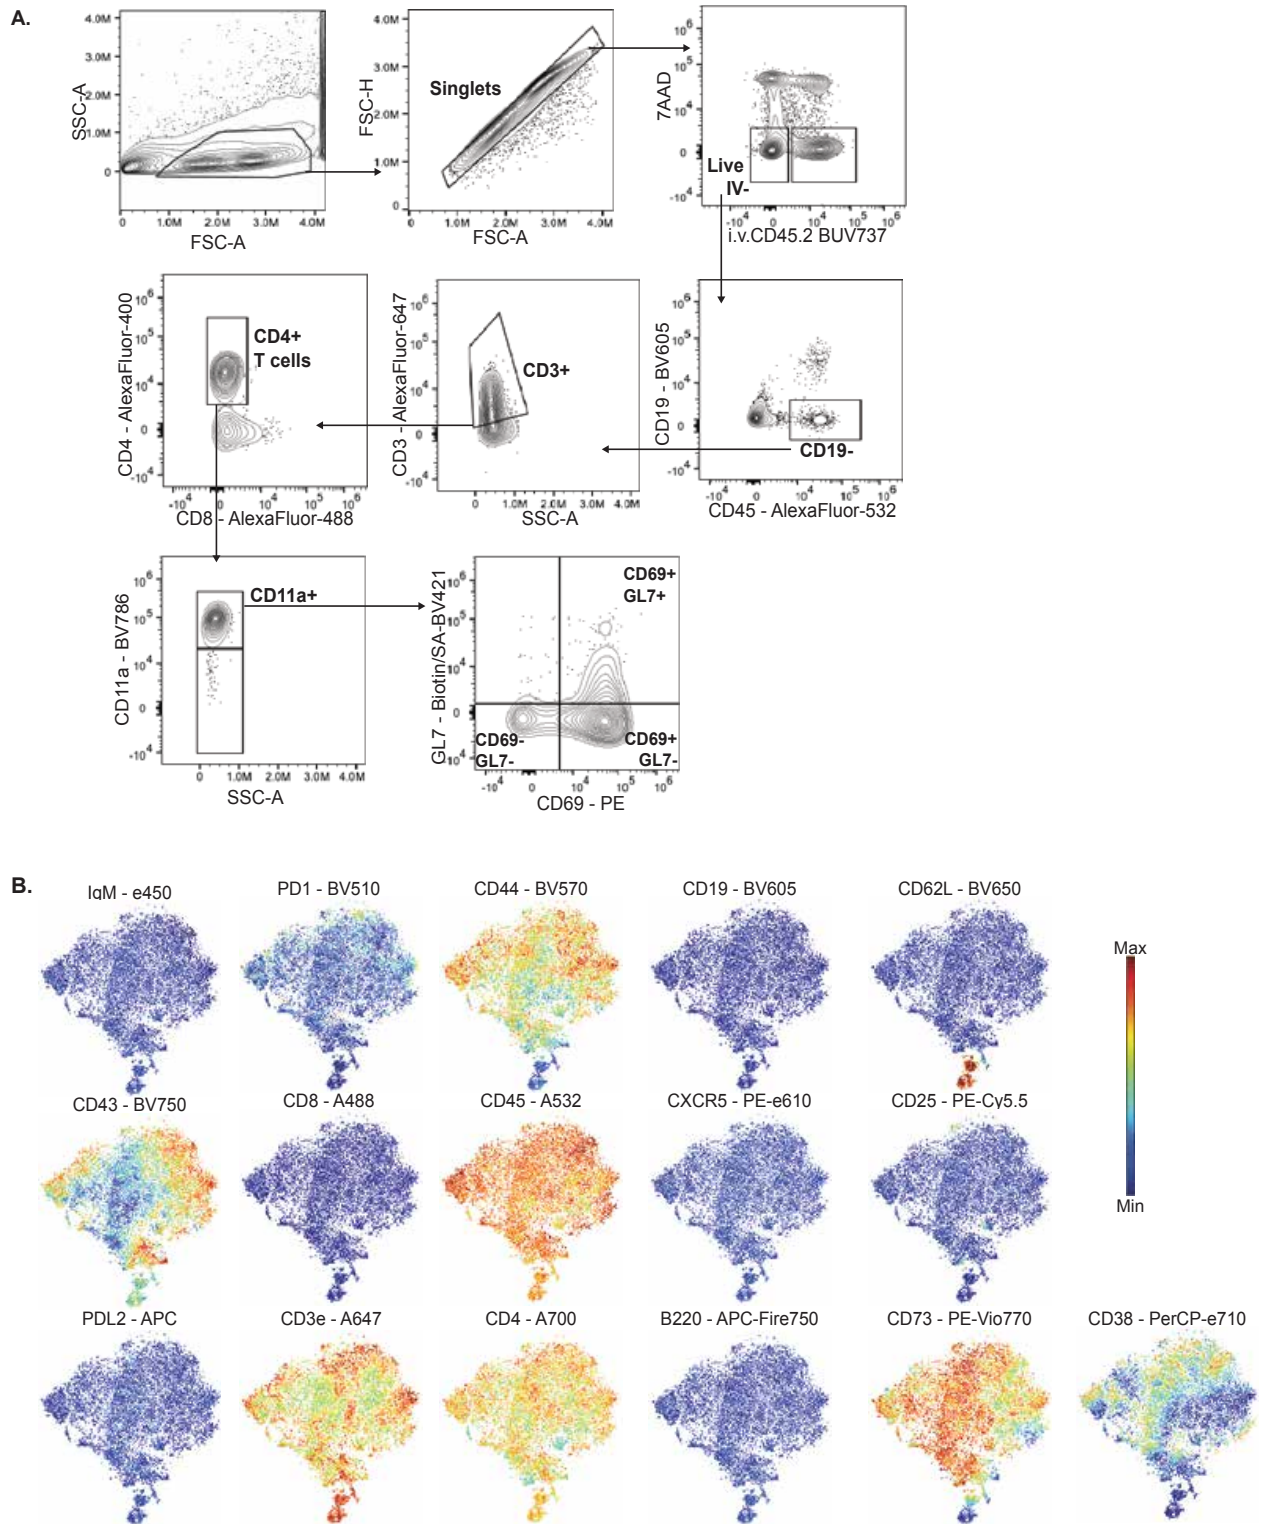

**Supplemental Figure 1. Identification of lung CD4<sup>+</sup> T<sub>RM</sub> subsets. A)** Manual gating strategy to define live lung (i.v. CD45.2<sup>-</sup>) CD4<sup>+</sup> T cell subsets in experienced mouse lungs after 3 min of i.v. injection of anti-CD45.2 antibody. **B)** Heat maps depiction of expression level of surface markers overlaid on opt-SNE plots of lung (i.v. CD45.2<sup>-</sup>) CD4<sup>+</sup>T cell from n=6 experienced mice.

## Supplemental Figure 2

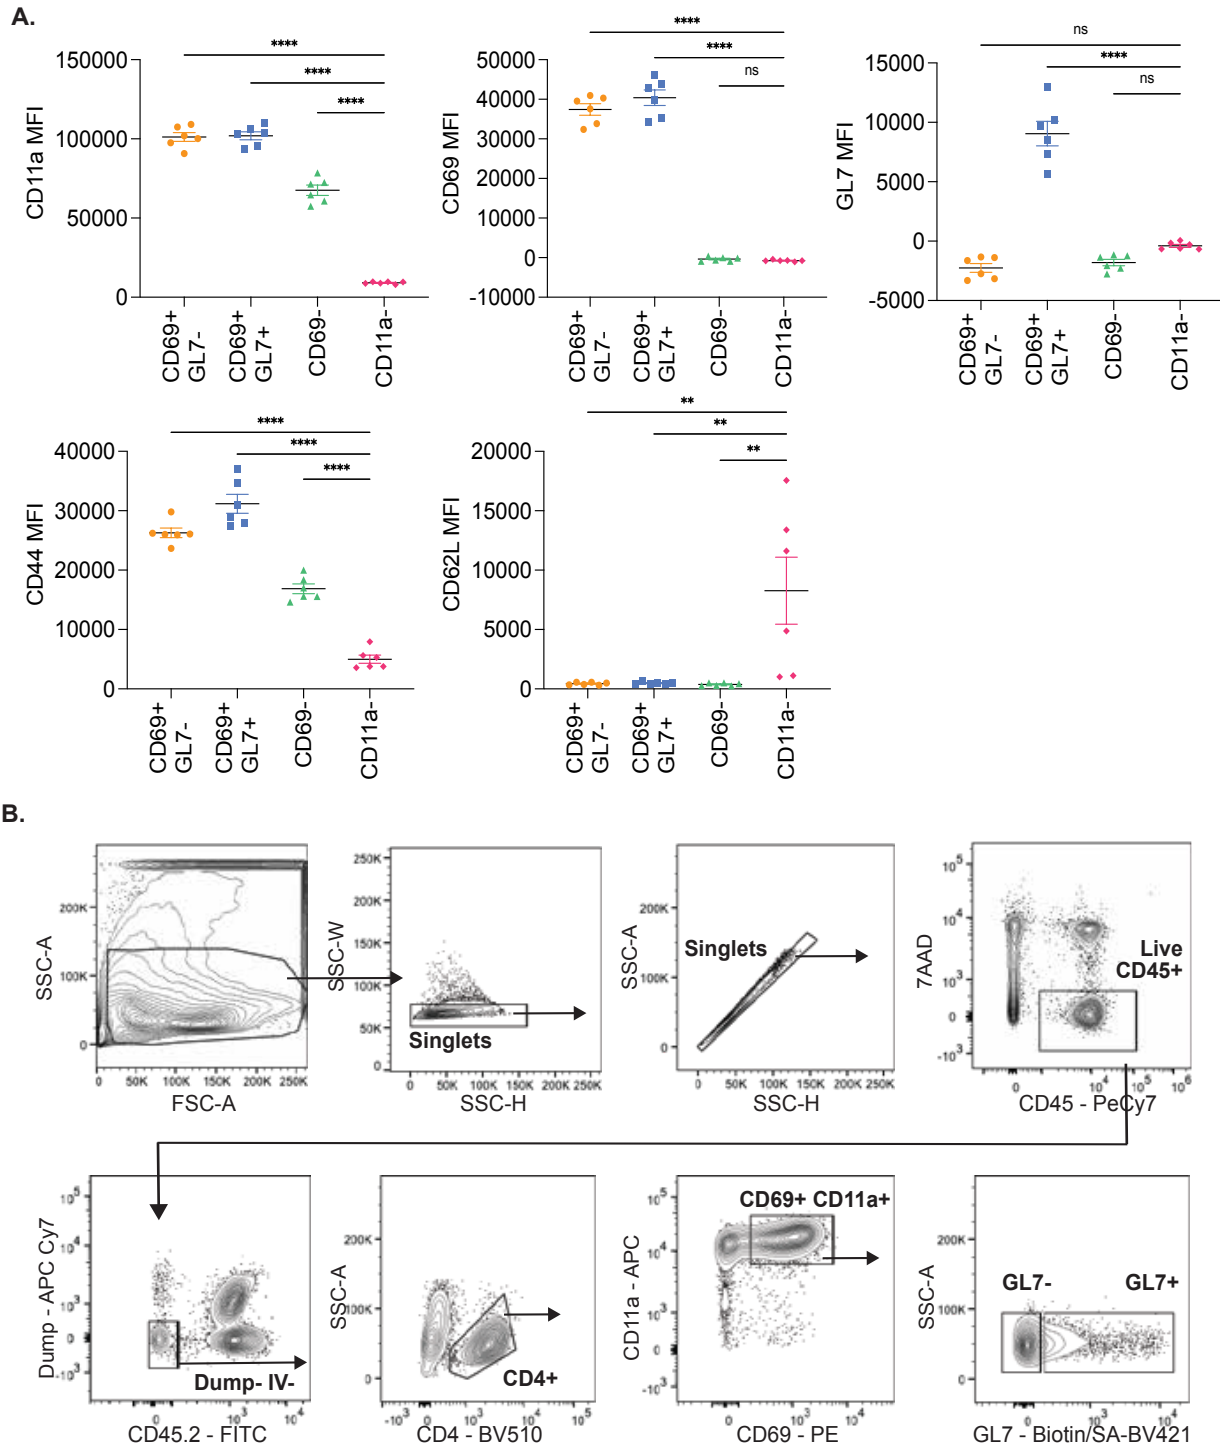

**Supplemental Figure 2. Characterization of lung CD4<sup>+</sup> T<sub>RM</sub> subsets. A)** Mean fluorescence intensity (MFI) of expression in all subsets of lung (i.v. CD45.2<sup>+</sup>) CD4<sup>+</sup> T cells. One-way ANOVA with Dunnett's multiple comparisons test against CD11a<sup>+</sup> subset, \*\*p=0.002, \*\*\*\*p<0.0001. n=6, two independent experiments. **B)** Sorting gating

strategy to separate GL7+ and GL7- subsets of lung (i.v. CD45.2-) CD4<sup>+</sup> CD69<sup>+</sup>CD11a<sup>+</sup> cells. Sorted cells from 6 mice pooled during sort. Anti-CD8 and anti-CD11c were included in dump color cocktail.

### Supplemental Figure 3

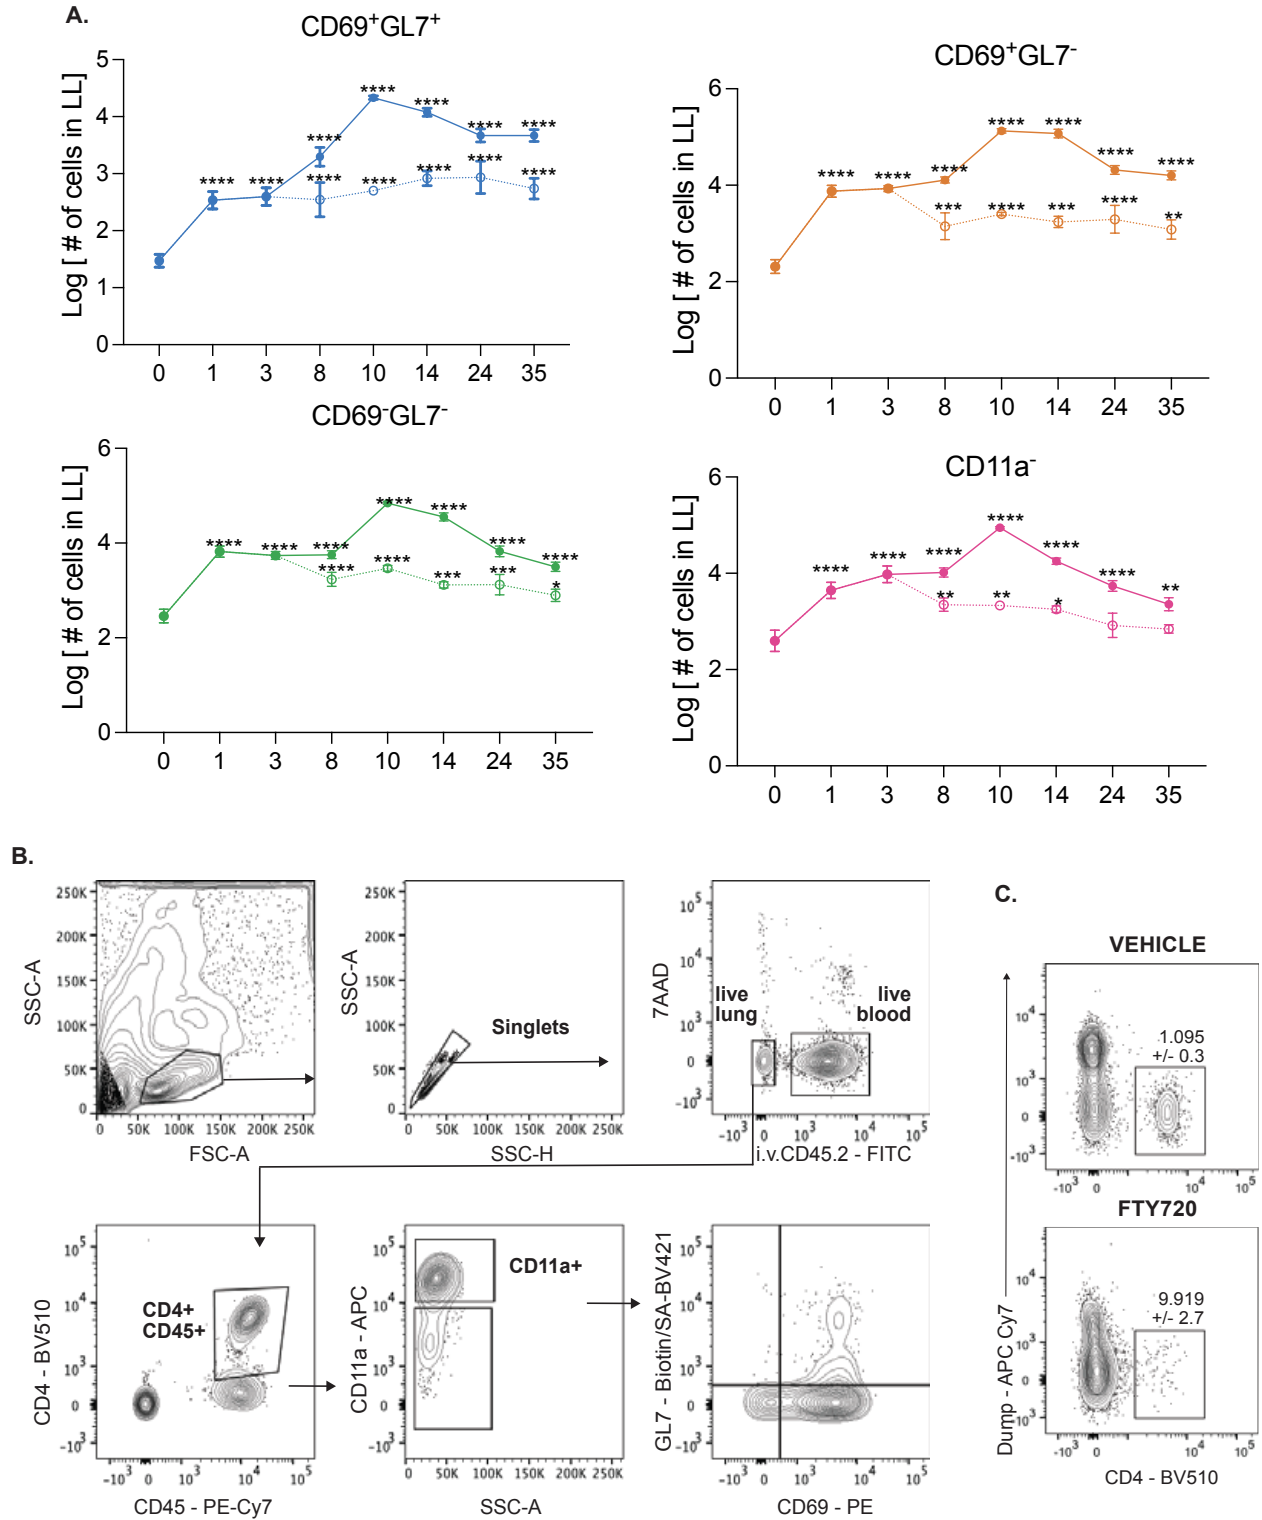

**Supplemental Figure 3. Dynamics of lung CD4<sup>+</sup> T cell subsets. A)** Cell counts of each subset of lung (i.v.CD45.2<sup>-</sup>) CD4<sup>+</sup> T cells across heterotypic immune timeline after

receiving 1x or 2x i.t. infections with Sp19F at days 0 and 7. Data shown as log transformed mean and SEM. n=6 per group, two independent experiments. 2-way ANOVA with Dunnett's multiple comparison tests against 0dpi, \*p=0.017 - 0.049, \*\*p=0.0017 - 0.0047, \*\*\*p=0.0001 - 0.0008, \*\*\*\*p<0.0001. FTY720 or vehicle i.p. to experienced mice at 1mg/kg every other day for 12 days. **B)** Gating strategy to identify lung (i.v.CD45.2<sup>-</sup>) and blood (i.v.CD45.2<sup>+</sup>) CD45<sup>+</sup>CD4<sup>+</sup> T cells in FTY720 or vehicle treated mice. **C)** Representative flow cytometry plots and mean  $\pm$  standard deviation of frequency of live blood (i.v.CD45.2<sup>+</sup>) CD45<sup>+</sup>CD4<sup>+</sup> from LL, n=10 per group, two independent experiments.

# Supplemental Figure 4

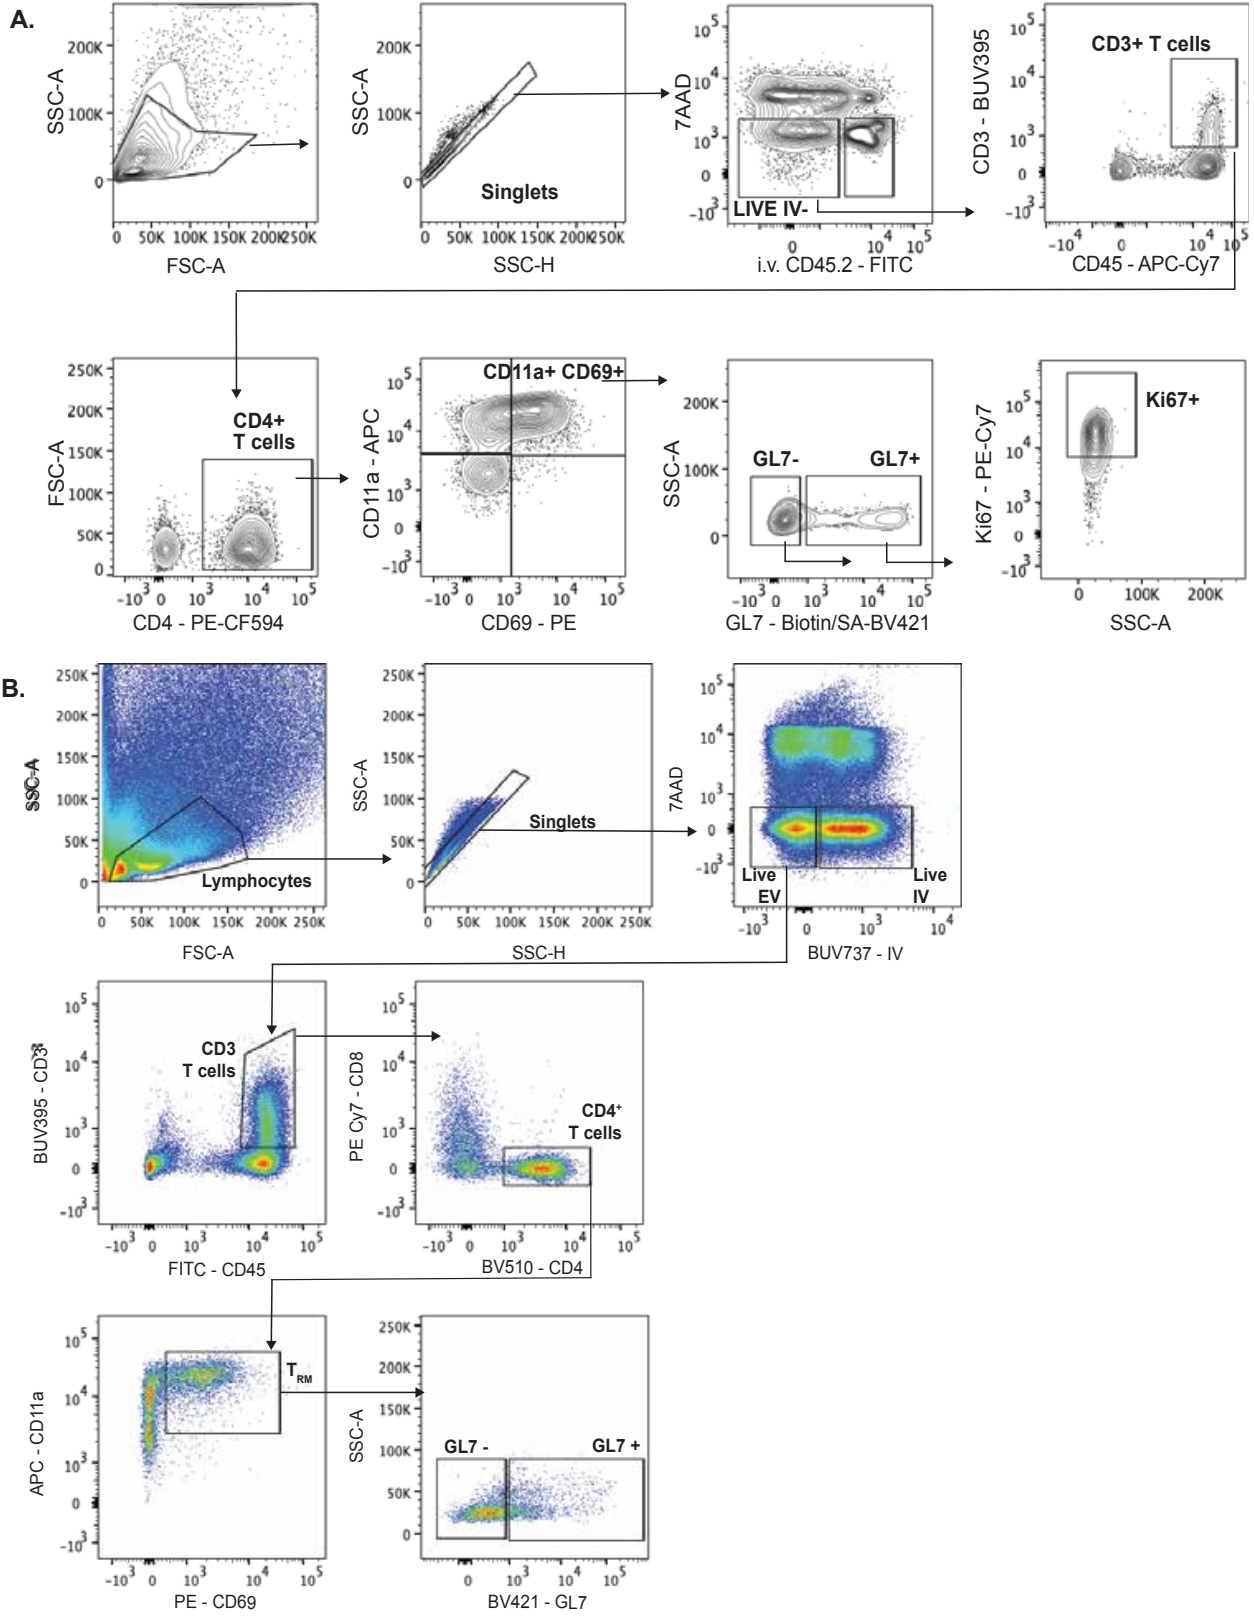



**Supplemental Figure 4. Ki67 Characterization of GL7<sup>+</sup> T<sub>RM</sub> subsets. A)** Gating strategy to evaluate Ki67 expression in GL7<sup>+</sup> and GL7<sup>-</sup> subsets of lung (i.v.CD45.2<sup>-</sup>) CD4<sup>+</sup> CD69<sup>+</sup>CD11a<sup>+</sup> T cells. **B)** Gating strategy to evaluate percent of GL7<sup>+</sup> and GL7<sup>-</sup> cells of lung (i.v.CD45.2<sup>-</sup>) CD4<sup>+</sup> CD69<sup>+</sup>CD11a<sup>+</sup> T cells in cells infected with Sp19F or killed KPN or IAV.

## Supplemental Figure 5

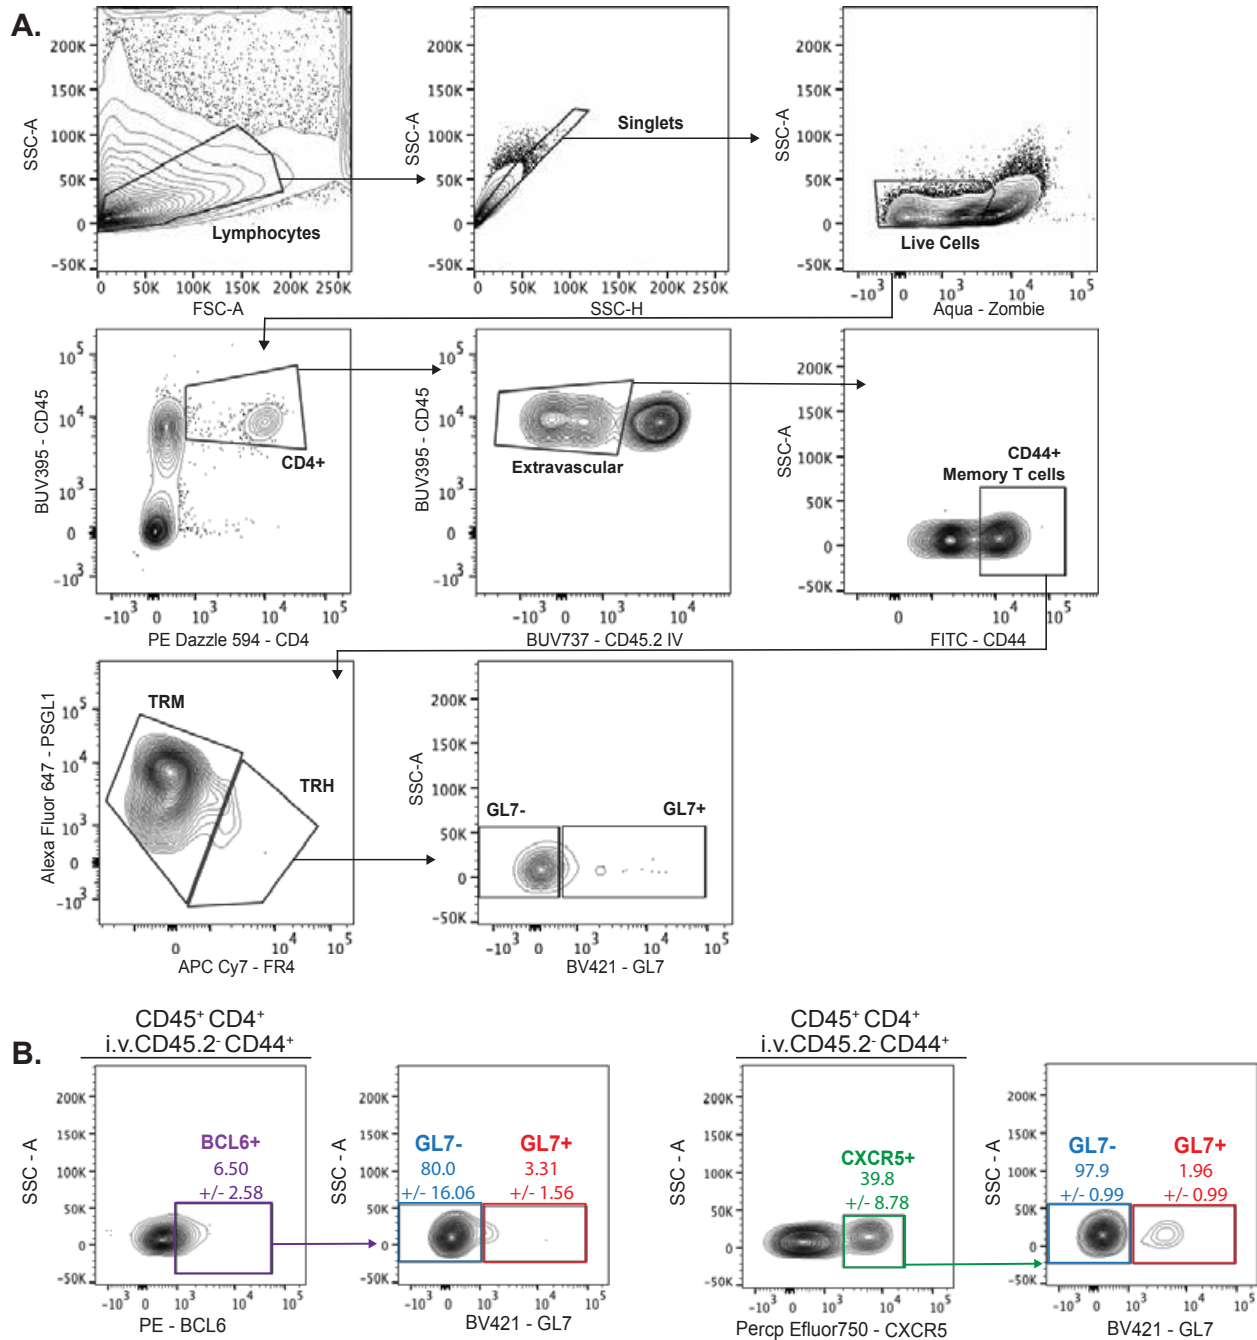

**Supplemental Figure 5. Gating strategy to evaluate TRM vs TRH phenotypes in memory T cells. A)** Gating strategy used to evaluate expression of GL7 in PSGL1 and FR4 subsets of lung (i.v.CD45.2-) CD4<sup>+</sup>CD44<sup>+</sup> memory T cells in mouse lungs processed with manual digestion method. **B)** Representative flow cytometry plots and mean  $\pm$  standard error of mean of GL7 subsets in BCL6<sup>+</sup> and CXCR5<sup>+</sup> populations in lung (i.v.CD45.2-) CD4<sup>+</sup>CD44<sup>+</sup> memory T cells in mouse lungs processed with manual digestion method, n=6, two independent experiments.

## Supplemental Figure 6

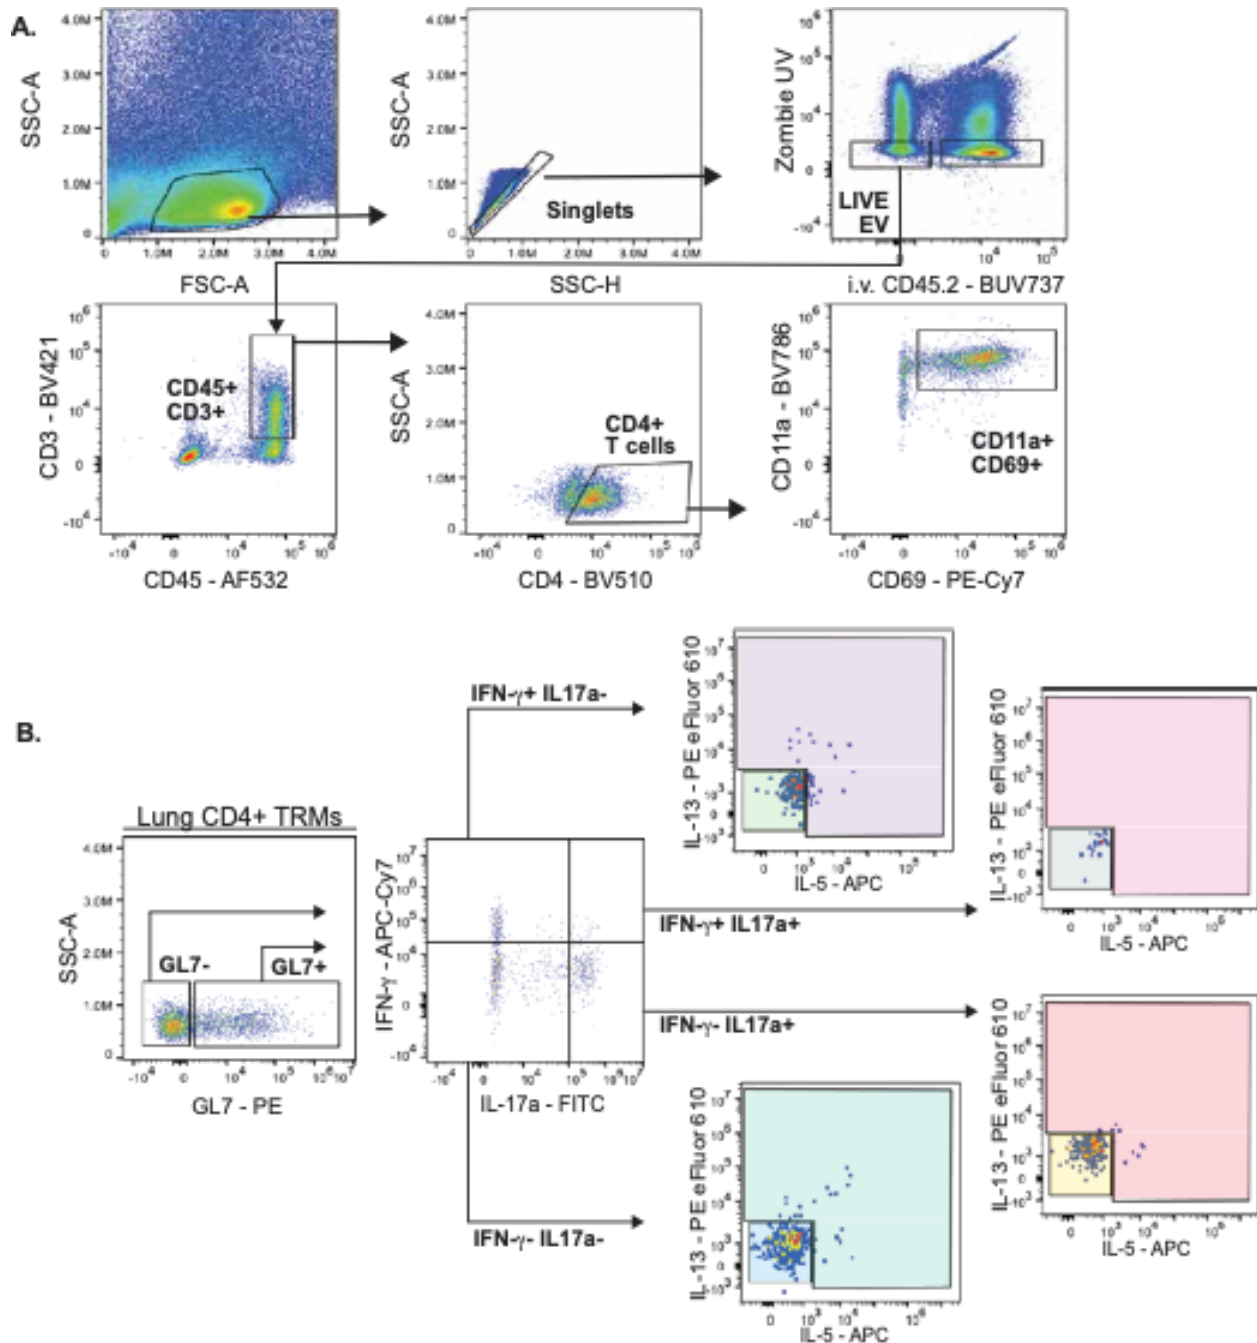

### Supplemental Figure 6. Gating strategy to evaluate intracellular cytokine staining profiles of GL7<sup>+</sup> T<sub>RM</sub> subsets.

**A)** Intracellular cytokine staining (ICS) gating strategy used to evaluate cytokine secretion in GL7<sup>+</sup> and GL7<sup>-</sup> subsets of lung (i.v.CD45.2<sup>-</sup>) CD4<sup>+</sup> T<sub>RM</sub> cells. **B)** Nested gating strategy to identify expression of one, two, three, or four cytokines in GL7<sup>+</sup> and GL7<sup>-</sup> subsets of lung (i.v.CD45.2<sup>-</sup>) CD4<sup>+</sup> T<sub>RM</sub> cells.

## Supplemental Figure 7

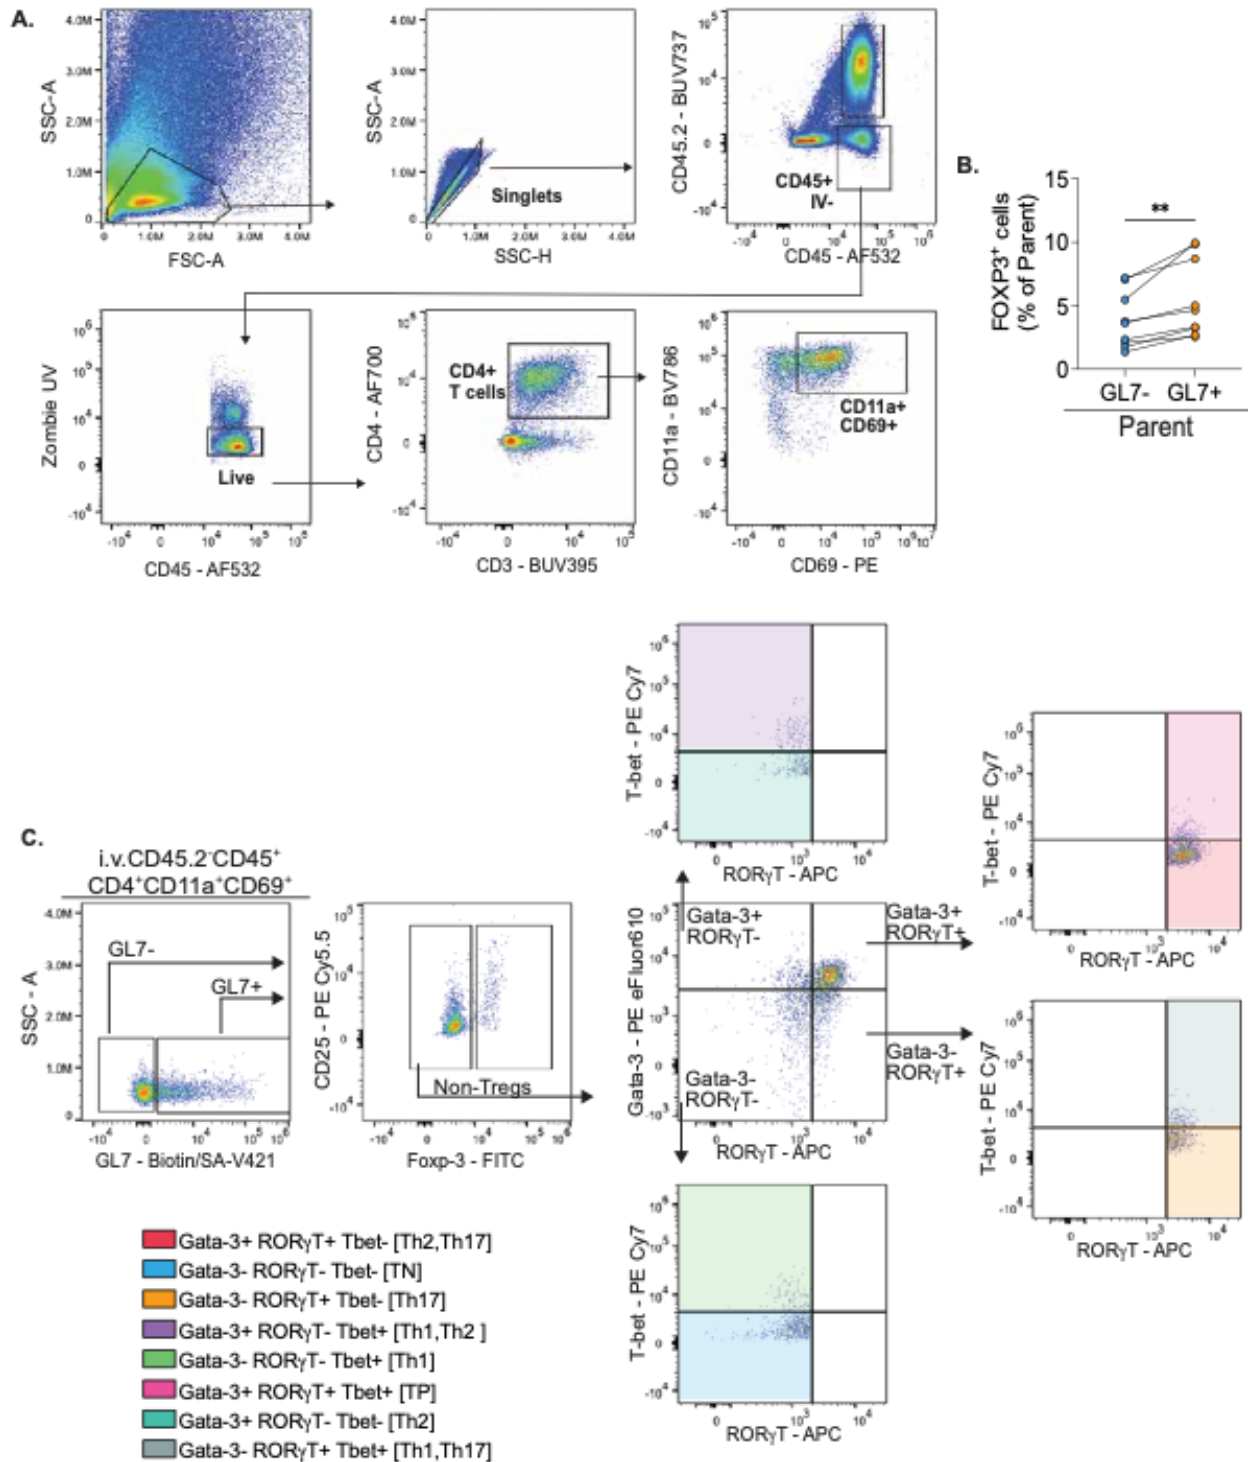

**Supplemental Figure 7. Gating strategy for functional evaluation of GL7<sup>+</sup> TRM subsets.**

**A)** Manual gating strategy to identify expression of transcription factors in subsets of lung CD4<sup>+</sup> T<sub>RM</sub> cells. **B)** Quantification of percent of FOXP3<sup>+</sup> cells in parent population (GL7<sup>+</sup> or GL7<sup>-</sup> T<sub>RM</sub>), n=9, two independent experiments, paired T-test, \*\*p=0.0032.

**C)** Nested gating strategy to identify expression of one, two or more transcription factors in both GL7<sup>+</sup> and GL7<sup>-</sup> subsets of lung (i.v.CD45.2<sup>-</sup>) CD4<sup>+</sup> T<sub>RM</sub> cells. Lung CD4<sup>+</sup> T<sub>RM</sub> cells gated as shown in **A**. Subsets labeled based on the lineage-defining transcription factors (LDTF) they express.

## SUPPLEMENTAL TABLES

| <b>Supplemental Table 1: List of antibodies used in this study</b> |                  |              |                |                    |
|--------------------------------------------------------------------|------------------|--------------|----------------|--------------------|
| <b>Marker</b>                                                      | <b>Conjugate</b> | <b>Clone</b> | <b>Vendor</b>  | <b>Catalogue #</b> |
| B220                                                               | APC-Fire750      | RA3-6B2      | Biologend      | 103259             |
| BCL6                                                               | AF488            | K112-91      | BD Biosciences | 561524             |
| BCL6                                                               | PE               | K112-91      | BD Biosciences | 561522             |
| CD103                                                              | BV711            | 2E7-         | Biologend      | 121435             |
| CD11a                                                              | BV786            | M17          | BD Biosciences | 740866             |
| CD11a                                                              | APC              | M17/4        | invitrogen     | 17-011-82          |
| CD19                                                               | BV605            | 6D5          | Biologend      | 115539             |
| CD25                                                               | PE-Cy5.5         | PC61.5       | Thermo Fisher  | 35-0251-80         |
| CD3                                                                | AF647            | 145-2C11     | Biologend      | 100322             |
| CD3                                                                | BV421            | 145-2c11     | Biologend      | 100335             |
| CD3                                                                | BUV395           | 145-2c11     | BD Biosciences | 563565             |
| CD38                                                               | PerCP-e710       | 90           | Thermo Fisher  | 46-0381-80         |
| CD4                                                                | AF700            | RM4-4        | Biologend      | 116021             |
| CD4                                                                | BV510            | GK1.5        | Biologend      | 100449             |
| CD4                                                                | PE-CF594         | RM4-5        | BD Biosciences | 562314             |
| CD4                                                                | PE-Dazzle594     | GK1.5        | Biologend      | 100456             |
| CD43                                                               | BV750            | S7           | BD Biosciences | 747277             |
| CD44                                                               | BV570            | IM7          | Biologend      | 103037             |
| CD44                                                               | FITC             | IM7          | Biologend      | 103006             |
| CD45                                                               | AF532            | 30-F11       | Thermo Fisher  | 58-0451-82         |
| CD45                                                               | APC Cy7          | 30-F11       | Biologend      | 103115             |
| CD45                                                               | BUV395           | HI30         | BD Biosciences | 563791             |
| CD45.2                                                             | BUV737           | 104          | BD Biosciences | 612778             |
| CD62L                                                              | BV650            | MEL-14.      | BD Biosciences | 564108             |
| CD69                                                               | PE               | H1.2F3       | Biologend      | 104508             |
| CD69                                                               | PECY7            | H1.2F3       | Biologend      | 104512             |
| CD73                                                               | PE-Vio770        | REA778       | Miltenyi       | 130-111-519        |
| CD8                                                                | AF488            | 53-6.7       | Biologend      | 100723             |
| CXCR5                                                              | PE-e610          | SPRCL5       | Thermo Fisher  | 61-7185-82         |
| CXCR5                                                              | PerCP-eFluor750  | SPRCL5       | Thermo Fisher  | 46-7185-82         |
| FOXP3                                                              | FITC             | FJK-16s      | Invitrogen     | 2126755            |
| FR4                                                                | APC Fire-750     | 12A5         | Biologend      | 125013             |
| FR4                                                                | PerCP Cy5.5      | 12A5         | Biologend      | 125018             |
| Gata-3                                                             | PE-e610          | TWAJ         | Invitrogen     | 2187622            |
| GL7                                                                | Biotin           | GL7          | Biologend      | 144616             |
| GL7                                                                | PE               | GL7          | Biologend      | 144608             |
| ICOS                                                               | BV650            | C398.4       | BD Biosciences | 568041             |
| IFN- $\gamma$                                                      | APC Cy7          | XMG1.2       | Biologend      | 505850             |
| IgD                                                                | AF488            | 11-26c.2a    | Biologend      | 405717             |
| IgM                                                                | e450             | eB121-15F9   | Thermo Fisher  | 48-5890-82         |
| IL-13                                                              | PE E610          | eBIO13A      | Thermo Fisher  | 61-7133-82         |

|                |                 |              |                |            |
|----------------|-----------------|--------------|----------------|------------|
| IL-17a         | FITC            | TC11-18H10.1 | Biologend      | 506908     |
| IL-5           | APC             | TRFK5        | Biologend      | 504306     |
| Ki67           | PeCy7           | 16A8         | Biologend      | 652426     |
| PD1            | BV510           | 29F.1A12     | Biologend      | 135241     |
| PD1            | PE-Cy7          | 29F.1A12     | Biologend      | 135216     |
| PDL2           | APC             | TY25         | Biologend      | 107210     |
| PSGL1          | Alexa Fluor 647 | 4RA10        | Thermo Fisher  | 16-6763-84 |
| ROR $\gamma$ T | APC             | B2D          | Invitrogen     | 17-6981-80 |
| Streptavidin   | BV421           | n/a          | Biologend      | 405225     |
| Streptavidin   | APC-Fire750     | n/a          | Biologend      | 405260     |
| T-bet          | PE-Cy7          | 4B10         | Biologend      | 644823     |
| ZOMBIE         | AQUA            | n/a          | Biologend      | 423101     |
| ZOMBIE         | UV              | n/a          | Biologend      | 423107     |
|                | 7AAD            | n/a          | BD Biosciences | 559925     |

**Supplemental Table 2: Parameters for duplex fluorescent IHC assay performed in this study**

| Sequence Order                                                                             | Antigen Target | Species Origin | Clone | Manufacturer | Catalog    | Primary probe or antibody Dilution | Antigen Retrieval (Ventana) | Incubation Temperature | Incubation Period | Fluorophore       |
|--------------------------------------------------------------------------------------------|----------------|----------------|-------|--------------|------------|------------------------------------|-----------------------------|------------------------|-------------------|-------------------|
| 1                                                                                          | CD4            | Rabbit         | D7D2Z | CST          | 25229      | 1:50                               | CC1                         | RT                     | 24 Hrs.           | Opal 570<br>1:100 |
| 2                                                                                          | GL7            | Rat            | GL7   | BioLegend    | 14460<br>2 | 1:100                              | CC1                         | RT                     | 2 Hrs.            | Opal 520<br>1:100 |
| CC1-cell conditioning 1-Tris based antigen retrieval buffer; CST-cell signaling technology |                |                |       |              |            |                                    |                             |                        |                   |                   |
